# Supplementary material for: Central motor conduction time may predict response to fampridine in patients with multiple sclerosis
Source: PubMed Central journal article supplement — J Neurol Neurosurg Psychiatry. 2013 Dec 19;85(6):707–9. doi: 10.1136/jnnp-2013-306860 (PMC4033025; doi:10.1136/jnnp-2013-306860), 2013-12-19
Supplement: jnnp-2013-306860-s1.pdf [file jnnp-2013-306860-s1.pdf]

**Supplementary table 1: Clinical characteristics of MS patients.**

| Patient no. | Age (years) | Sex | Duration of MS (years) | Clinical subtype | Current DMT  | EDSS      |
|-------------|-------------|-----|------------------------|------------------|--------------|-----------|
| 1           | 73          | f   | 30                     | SPMS             | none         | 5.5       |
| 2           | 47          | f   | 25                     | SPMS             | IFN- $\beta$ | 4.0       |
| 3           | 53          | f   | 7                      | RRMS             | NAT          | 4.0       |
| 4           | 52          | f   | 12                     | RRMS             | FTY          | 6.5       |
| 5           | 57          | m   | 26                     | SPMS             | none         | 6.5       |
| 6           | 43          | m   | 18                     | SPMS             | none         | 6.0       |
| 7           | 63          | f   | 32                     | SPMS             | MIT          | 6.5       |
| 8           | 63          | f   | 34                     | SPMS             | none         | 6.0       |
| 9           | 46          | m   | 11                     | RRMS             | IFN- $\beta$ | 4.0       |
| 10          | 52          | m   | 20                     | SPMS             | none         | 4.0       |
| 11          | 46          | f   | 17                     | RRMS             | none         | 4.5       |
| 12          | 40          | m   | 16                     | SPMS             | IFN- $\beta$ | 5.5       |
| 13          | 70          | f   | 8                      | PPMS             | none         | 3.0       |
| 14          | 57          | f   | 21                     | SPMS             | none         | 4.0       |
| 15          | 41          | m   | 13                     | SPMS             | MIT          | 5.5       |
| 16          | 46          | m   | 7                      | SPMS             | none         | 5.0       |
| 17          | 59          | f   | 3                      | PPMS             | none         | 6.0       |
| 18          | 61          | f   | 4                      | PPMS             | none         | 6.0       |
| 19          | 31          | m   | 17                     | SPMS             | none         | 6.5       |
| 20          | 52          | m   | 26                     | SPMS             | none         | 6.5       |
| Mean        | 52.6        |     | 17.4                   |                  | Median       | 5.5       |
| $\pm$ SD    | $\pm$ 10.5  |     | $\pm$ 9.3              |                  | [range]      | [3.0-6.5] |

m = male; f = female; EDSS = expanded disability status scale; RRMS = relapsing-remitting MS; SPMS = secondary progressive MS; PPMS = primary progressive MS; DMT = disease modifying therapy with immunomodulators; IFN- $\beta$  = interferon  $\beta$ ; MIT = mitoxantrone; NAT = natalizumab; FTY = fingolimod.
